# Supplementary material for: Autistic traits influence the strategic diversity of information sampling: Insights from two-stage decision models
Source: PubMed Central journal article supplement (PMC6907874; doi:10.1371/journal.pcbi.1006964), 2019-12-02
Supplement: pcbi.1006964.s001.pdf [file pcbi.1006964.s001.pdf]

**S1 Table. Model descriptions.**

| Model                                                        | One- or two-stage? | Cost-first or evidence-first?            | Continue-then-2 <sup>nd</sup> -thought or stop-then-2 <sup>nd</sup> -thought? | Second-thought probabilities  | Number of parameters for sampling choice | Number of parameters for decision time | Cost-related decision variables                                                                 | Evidence-related decision variables                                                                         | Decay parameter |
|--------------------------------------------------------------|--------------------|------------------------------------------|-------------------------------------------------------------------------------|-------------------------------|------------------------------------------|----------------------------------------|-------------------------------------------------------------------------------------------------|-------------------------------------------------------------------------------------------------------------|-----------------|
| Cost only                                                    | One-stage          | N/A                                      | N/A                                                                           | N/A                           | 5                                        | 4                                      | A constant, unit cost (categorical, 3 levels), the number of beads sampled, total sampling cost | NA                                                                                                          | NA              |
| Evidence only w/o decay                                      | One-stage          | N/A                                      | N/A                                                                           | N/A                           | 6                                        | 4                                      | NA                                                                                              | A constant, unit log evidence, absolute value of cumulative information, total log evidence                 | NA              |
| Cost + Evidence decay                                        | One-stage          | N/A                                      | N/A                                                                           | N/A                           | 10                                       | 4                                      | As in <i>Cost only</i> model                                                                    | As in Evidence only w/o decay                                                                               | NA              |
| Cost + Evidence                                              | One-stage          | N/A                                      | N/A                                                                           | N/A                           | 11                                       | 4                                      | As in <i>Cost only</i> model                                                                    | A constant, unit log evidence, absolute value of decayed cumulative information, total decayed log evidence | $\alpha$        |
| Cost $\xrightarrow[\text{C-cond}]{\text{continue}}$ Evidence | Two-stage          | Cost-related variables in the first step | Continue sampling in the first step then having the second thought            | Controlled by cost conditions | 15                                       | 8                                      | As in <i>Cost only</i> model                                                                    | As in <i>Cost + Evidence</i> model                                                                          | $\alpha$        |

|                                                              |           |                                              |                                                                    |                                                          |    |   |                              |                                    |          |
|--------------------------------------------------------------|-----------|----------------------------------------------|--------------------------------------------------------------------|----------------------------------------------------------|----|---|------------------------------|------------------------------------|----------|
| Cost $\xrightarrow[\text{E-cond}]{\text{continue}}$ Evidence | Two-stage | Cost-related variables in the first step     | Continue sampling in the first step then having the second thought | Controlled by evidence conditions                        | 14 | 8 | As in <i>Cost only</i> model | As in <i>Cost + Evidence</i> model | $\alpha$ |
| Cost $\xrightarrow[\text{flex}]{\text{continue}}$ Evidence   | Two-stage | Cost-related variables in the first step     | Continue sampling in the first step then having the second thought | Controlled by the probability of stop in the first stage | 14 | 8 | As in <i>Cost only</i> model | As in <i>Cost + Evidence</i> model | $\alpha$ |
| Cost $\xrightarrow[\text{C-cond}]{\text{stop}}$ Evidence     | Two-stage | Cost-related variables in the first step     | Stop sampling in the first step then having the second thought     | Controlled by cost conditions                            | 15 | 8 | As in <i>Cost only</i> model | As in <i>Cost + Evidence</i> model | $\alpha$ |
| Cost $\xrightarrow[\text{E-cond}]{\text{stop}}$ Evidence     | Two-stage | Cost-related variables in the first step     | Stop sampling in the first step then having the second thought     | Controlled by evidence conditions                        | 14 | 8 | As in <i>Cost only</i> model | As in <i>Cost + Evidence</i> model | $\alpha$ |
| Cost $\xrightarrow[\text{flex}]{\text{stop}}$ Evidence       | Two-stage | Cost-related variables in the first step     | Stop sampling in the first step then having the second thought     | Controlled by the probability of stop in the first stage | 14 | 8 | As in <i>Cost only</i> model | As in <i>Cost + Evidence</i> model | $\alpha$ |
| Evidence $\xrightarrow[\text{C-cond}]{\text{continue}}$ Cost | Two-stage | Evidence-related variables in the first step | Continue sampling in the first step then having the second thought | Controlled by cost conditions                            | 15 | 8 | As in <i>Cost only</i> model | As in <i>Cost + Evidence</i> model | $\alpha$ |

|                                                              |           |                                              |                                                                    |                                                          |    |   |                              |                                    |          |
|--------------------------------------------------------------|-----------|----------------------------------------------|--------------------------------------------------------------------|----------------------------------------------------------|----|---|------------------------------|------------------------------------|----------|
| Evidence $\xrightarrow[E\text{-cond}]{\text{continue}}$ Cost | Two-stage | Evidence-related variables in the first step | Continue sampling in the first step then having the second thought | Controlled by evidence conditions                        | 14 | 8 | As in <i>Cost only</i> model | As in <i>Cost + Evidence</i> model | $\alpha$ |
| Evidence $\xrightarrow[\text{flex}]{\text{continue}}$ Cost   | Two-stage | Evidence-related variables in the first step | Continue sampling in the first step then having the second thought | Controlled by the probability of stop in the first stage | 14 | 8 | As in <i>Cost only</i> model | As in <i>Cost + Evidence</i> model | $\alpha$ |
| Evidence $\xrightarrow[C\text{-cond}]{\text{stop}}$ Cost     | Two-stage | Evidence-related variables in the first step | Stop sampling in the first step then having the second thought     | Controlled by cost conditions                            | 15 | 8 | As in <i>Cost only</i> model | As in <i>Cost + Evidence</i> model | $\alpha$ |
| Evidence $\xrightarrow[E\text{-cond}]{\text{stop}}$ Cost     | Two-stage | Evidence-related variables in the first step | Stop sampling in the first step then having the second thought     | Controlled by evidence conditions                        | 14 | 8 | As in <i>Cost only</i> model | As in <i>Cost + Evidence</i> model | $\alpha$ |
| Evidence $\xrightarrow[\text{flex}]{\text{stop}}$ Cost       | Two-stage | Evidence-related variables in the first step | Stop sampling in the first step then having the second thought     | Controlled by the probability of stop in the first stage | 14 | 8 | As in <i>Cost only</i> model | As in <i>Cost + Evidence</i> model | $\alpha$ |
