# Supplementary material for: Autistic traits influence the strategic diversity of information sampling: Insights from two-stage decision models
Source: PubMed Central journal article supplement (PMC6907874; doi:10.1371/journal.pcbi.1006964), 2019-12-02
Supplement: pcbi.1006964.s002.pdf [file pcbi.1006964.s002.pdf]

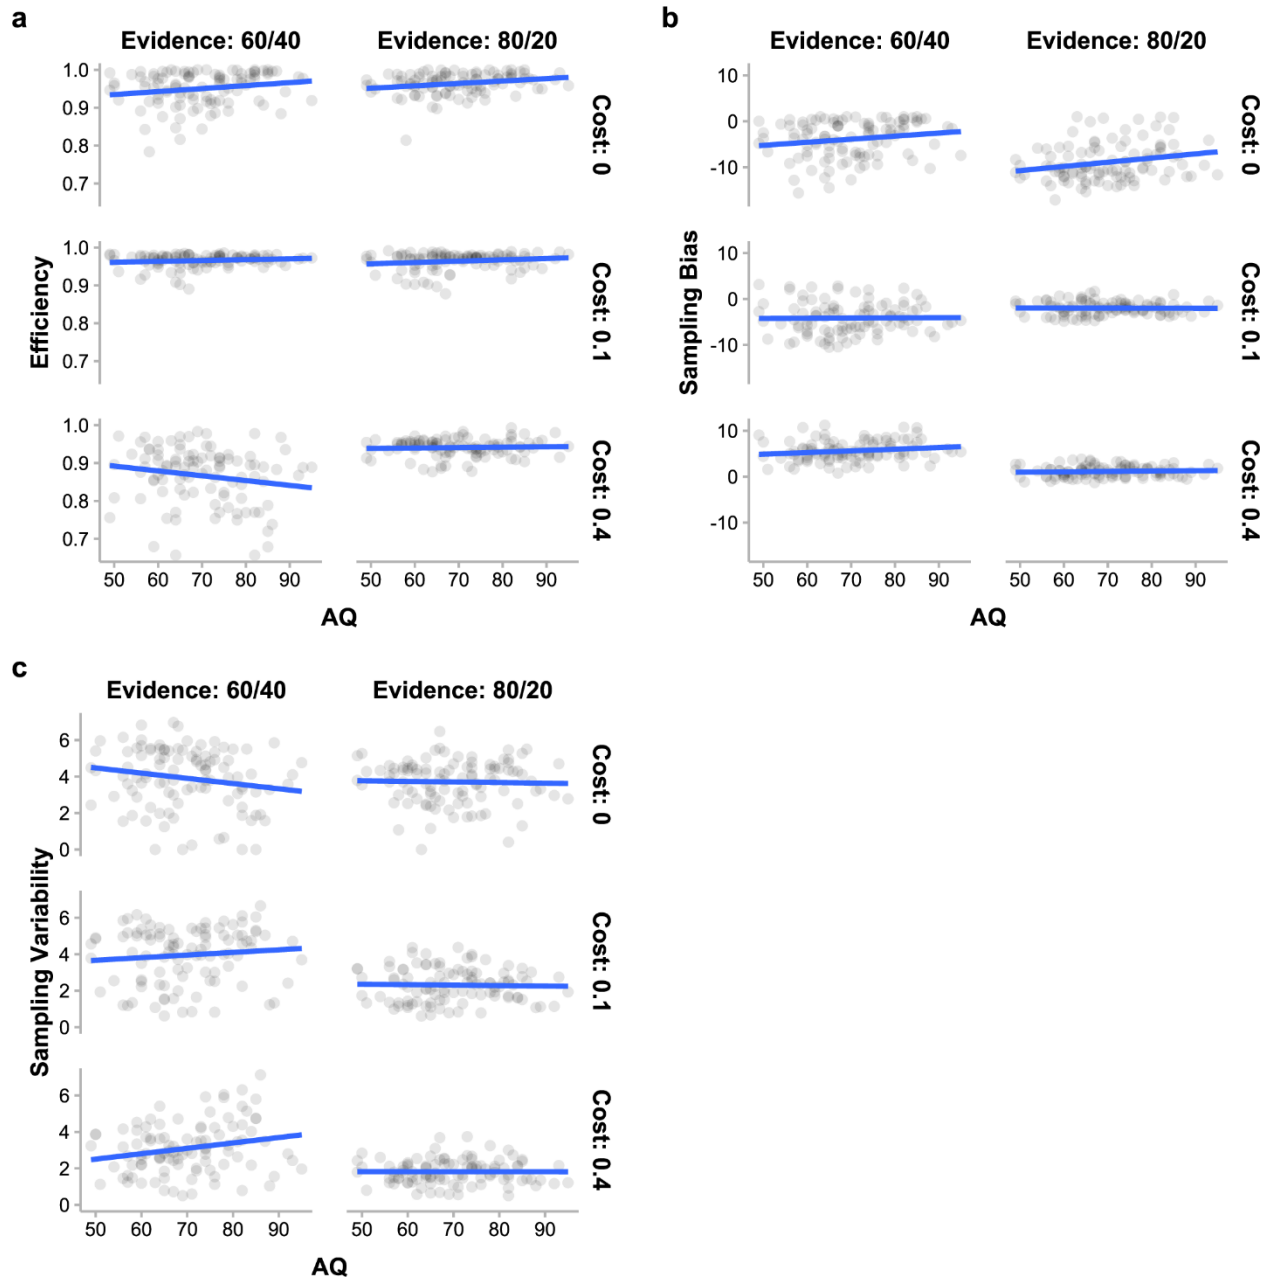

**S1 Fig. Scatter plots of AQ-related effects of interest: efficiency (a), sampling bias (b), and sampling variability (c).**

Each panel is for one cost and evidence condition. Each semi-transparent datapoint represents one participant. The blue line indicates the regression line against AQ, whose slope corresponds to the  $B_{AQ}$  in Fig 2d–f.
