# Supplementary material for: Autistic traits influence the strategic diversity of information sampling: Insights from two-stage decision models
Source: PubMed Central journal article supplement (PMC6907874; doi:10.1371/journal.pcbi.1006964), 2019-12-02
Supplement: pcbi.1006964.s004.pdf [file pcbi.1006964.s004.pdf]

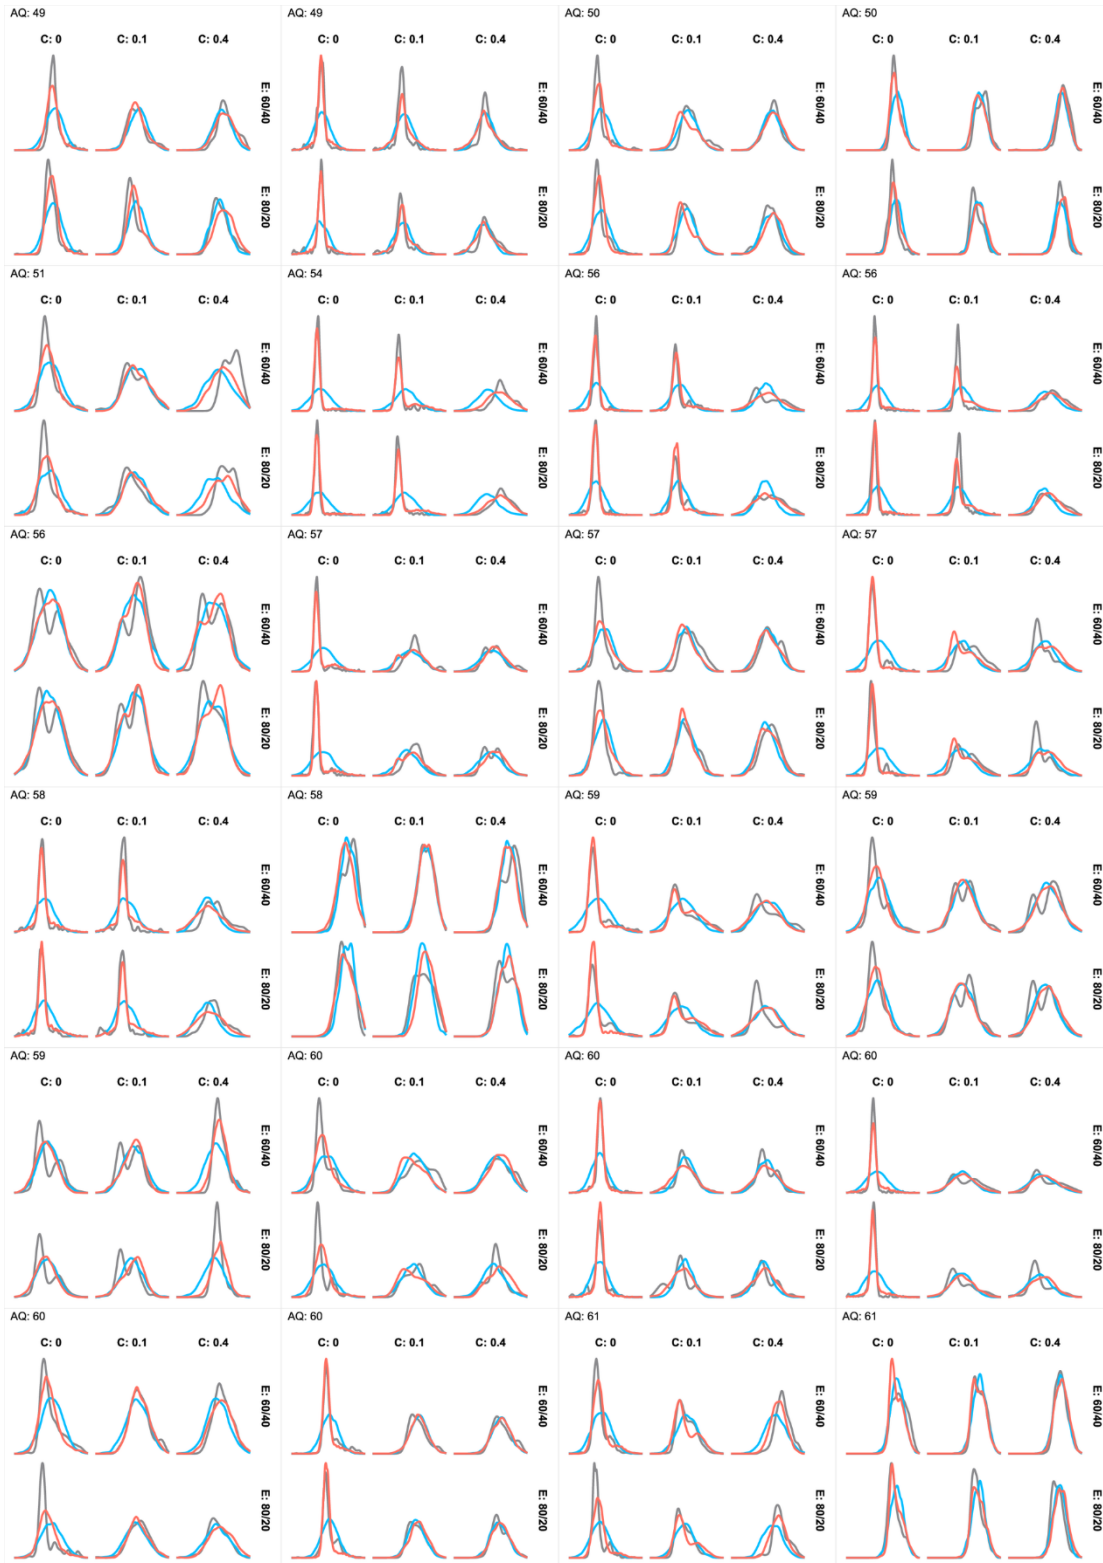

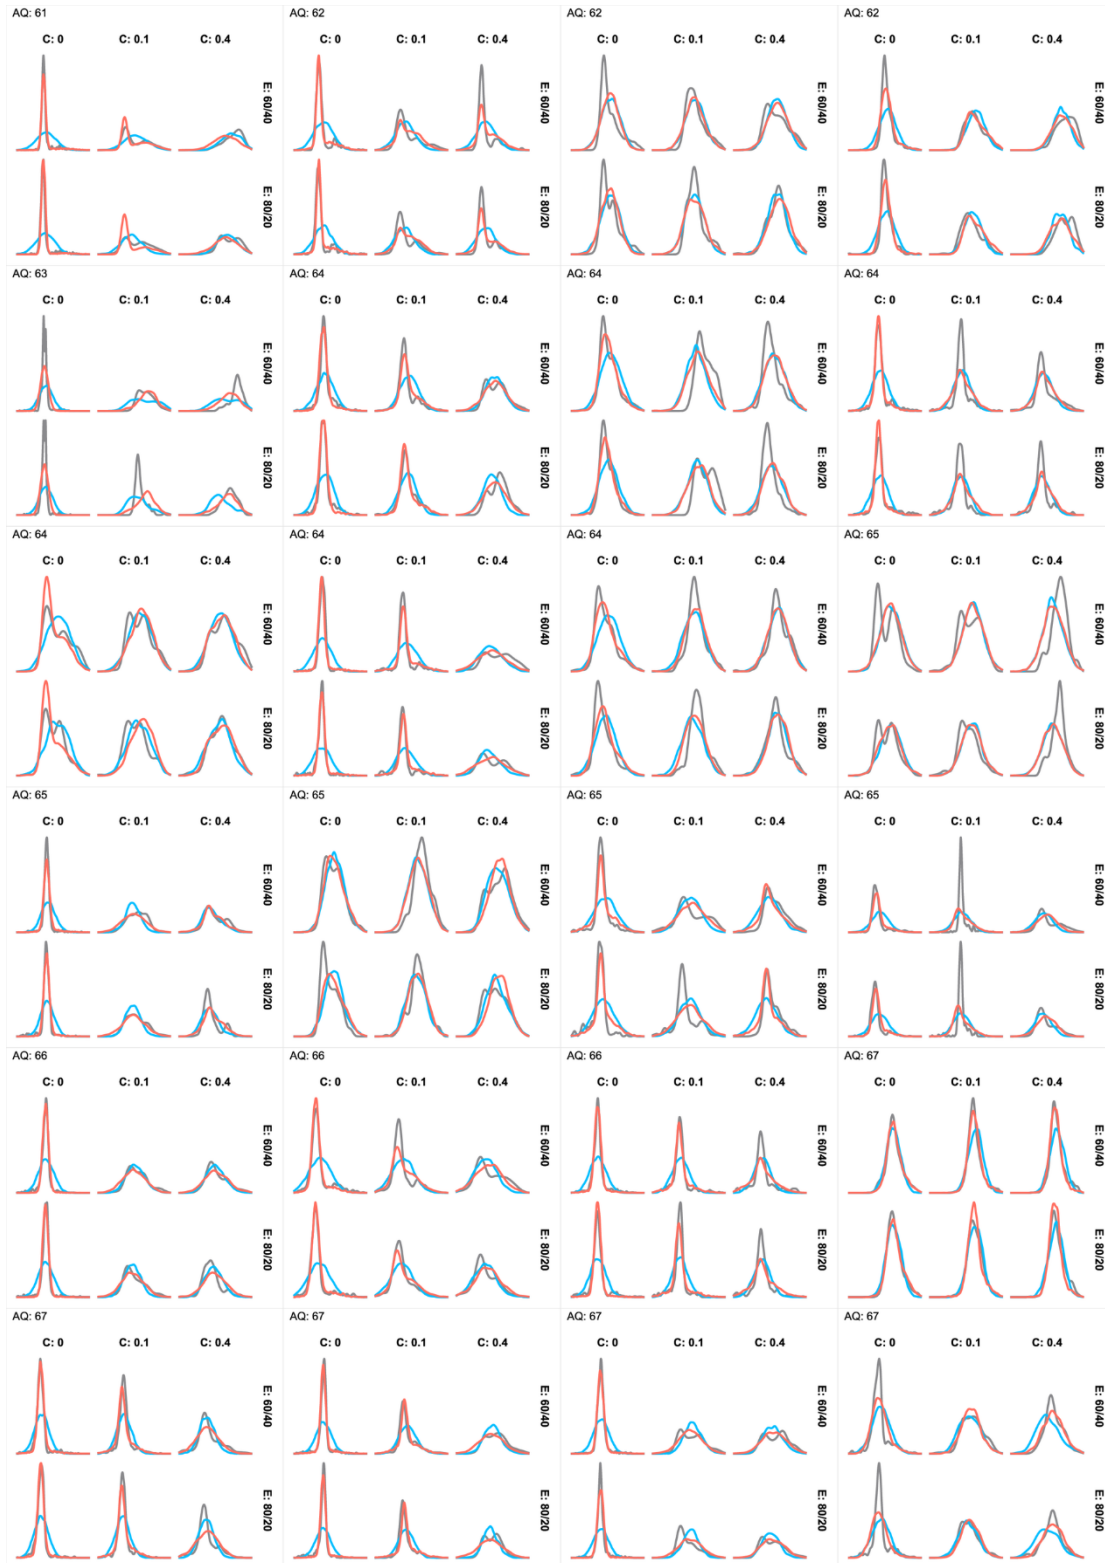

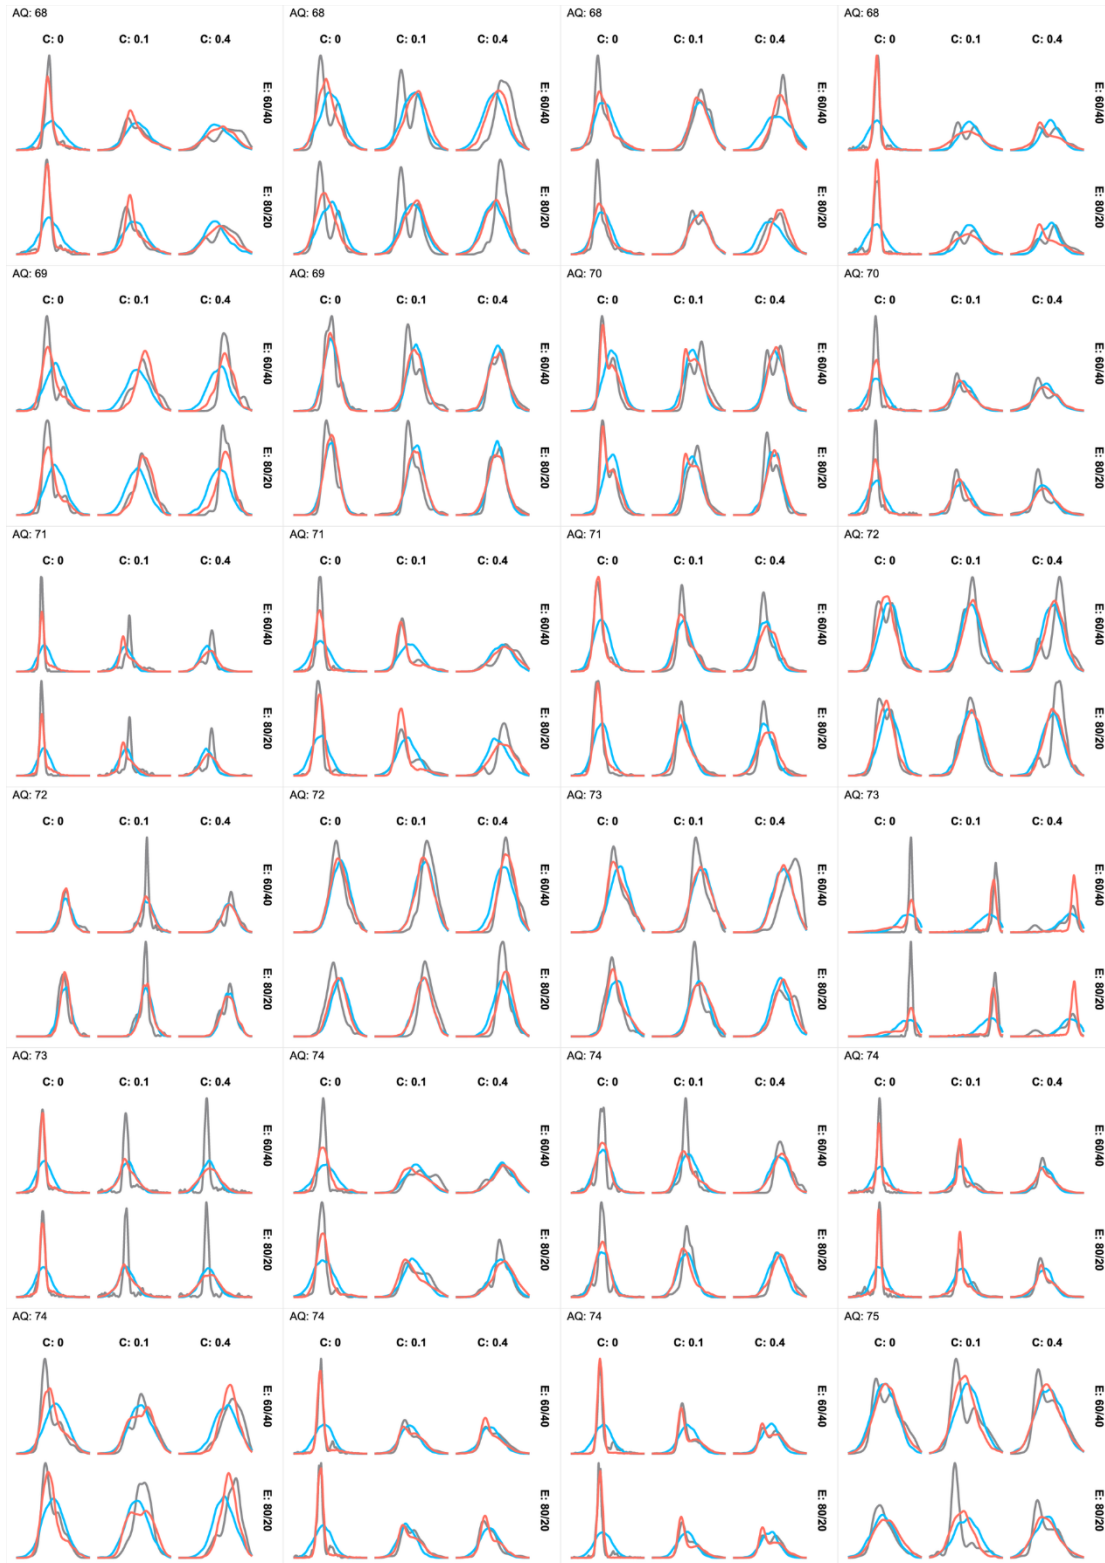

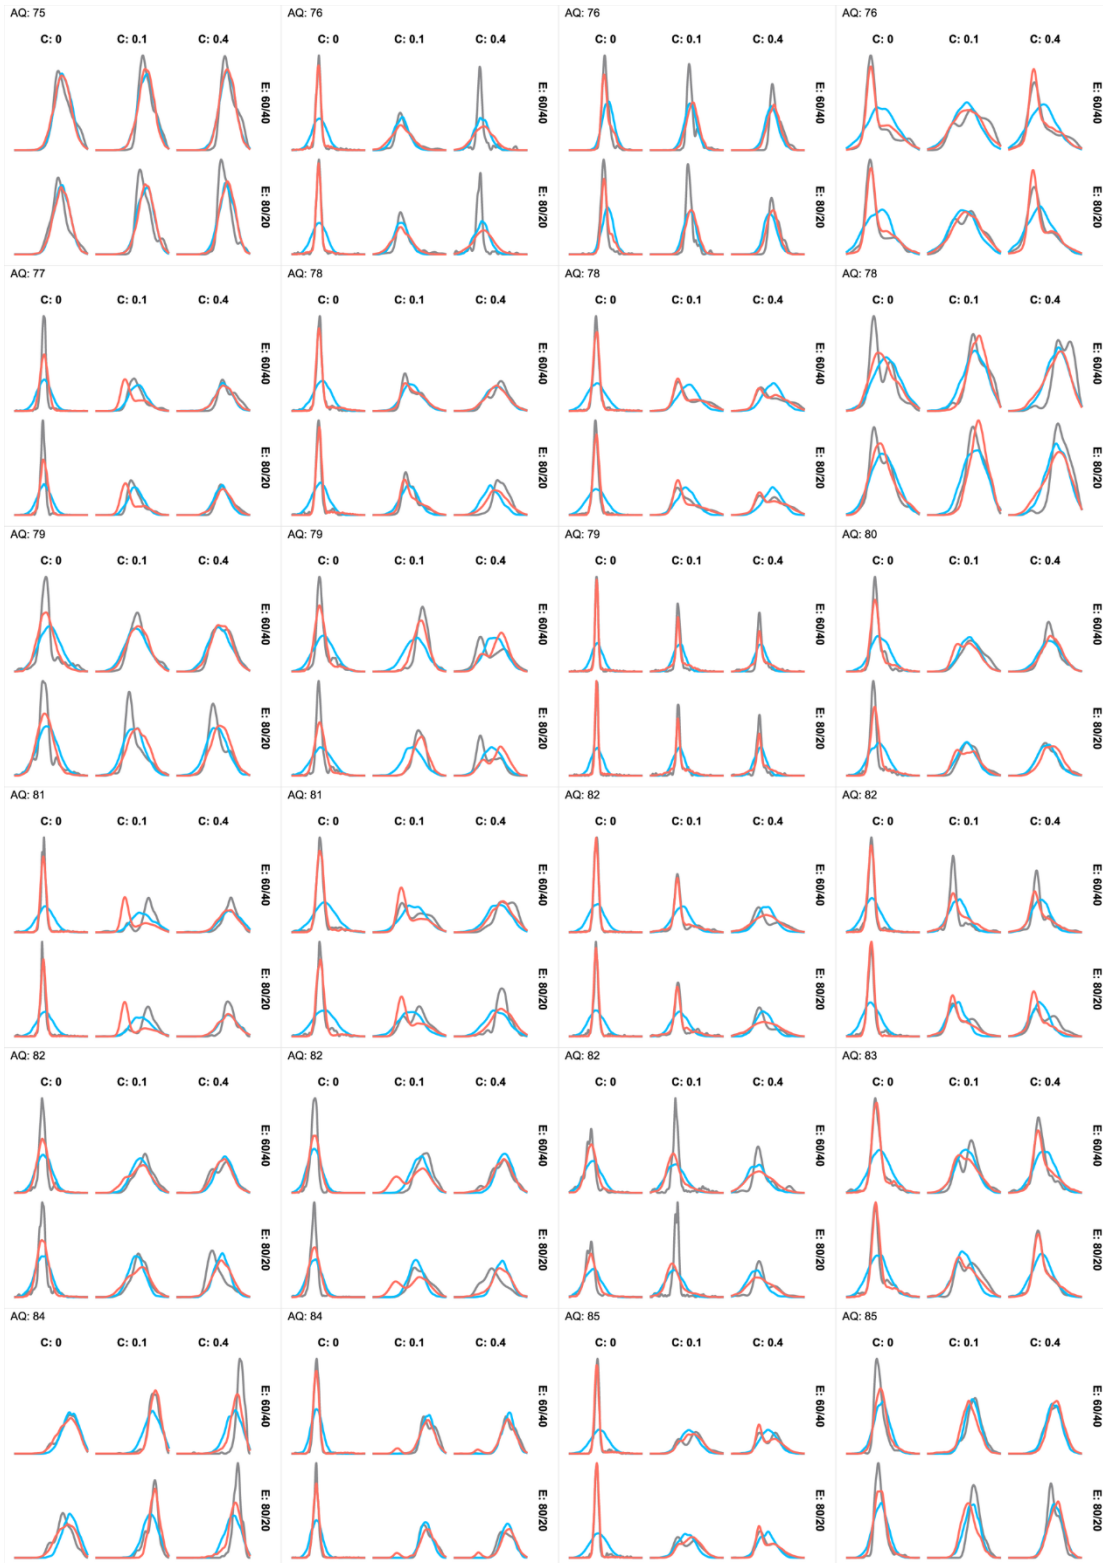

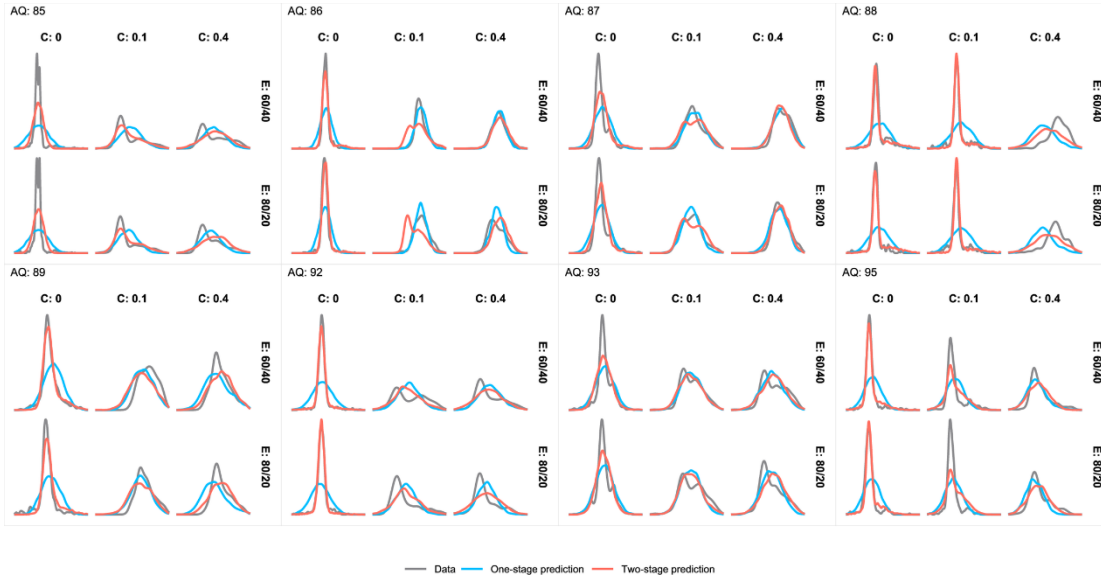

**S3 Fig. Decision time distributions of individual participants in each cost and evidence condition: data vs. model predictions (extended to 5 pages).**

Gray, blue, and red lines respectively denote data, the best one-stage model predictions, and the best two-stage model predictions. Each panel is for one participant, with each of its sub-panels for one cost and evidence condition. Panels are arranged by participants' AQ (marked at the top-left corner) ascendingly from left to right and from top to bottom. For most participants, the observed DT distributions were bimodal and were better predicted by the best-fit one-stage model than by the best-fit one-stage model. C: Cost, E: Evidence.
