# Supplementary material for: Autistic traits influence the strategic diversity of information sampling: Insights from two-stage decision models
Source: PubMed Central journal article supplement (PMC6907874; doi:10.1371/journal.pcbi.1006964), 2019-12-02
Supplement: pcbi.1006964.s005.pdf [file pcbi.1006964.s005.pdf]

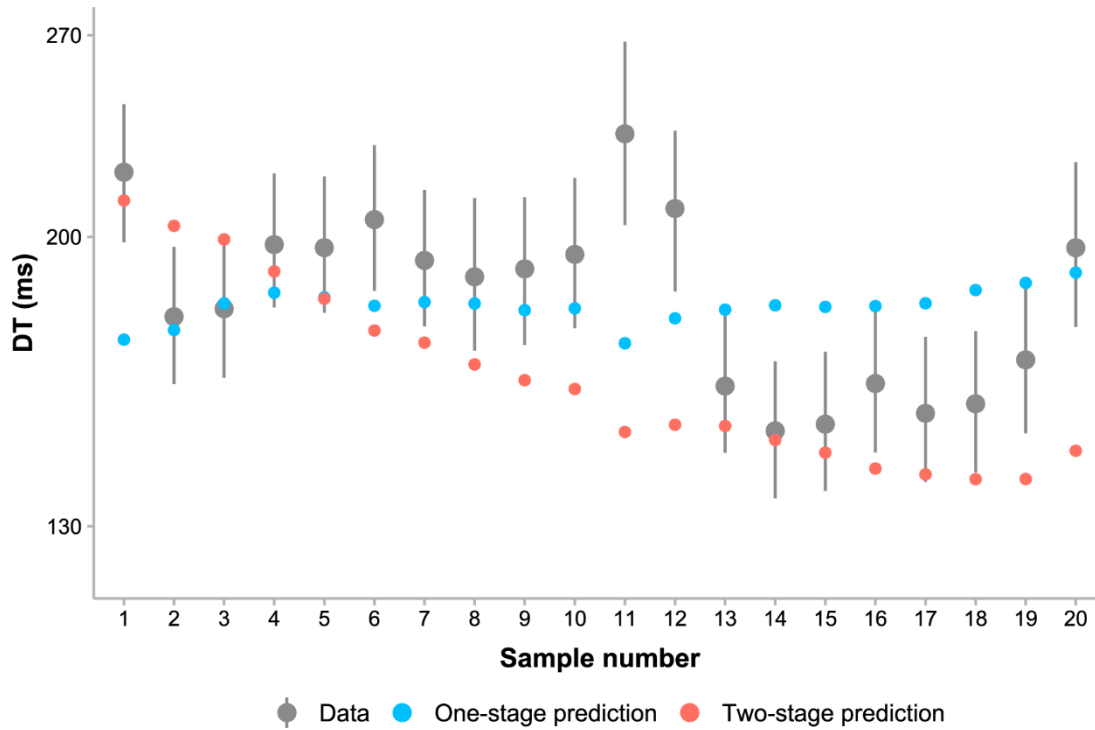

**S4 Fig. Decision time as a function of sample number: data vs. model predictions.** The observed decision times had a significant decreasing trend with the increase of sample number ( $t = -12.26, p < .001$ ), which was captured by the best two-stage model (red dots) but not by the best one-stage model (blue dots).
