# Supplementary material for: Autistic traits influence the strategic diversity of information sampling: Insights from two-stage decision models
Source: PubMed Central journal article supplement (PMC6907874; doi:10.1371/journal.pcbi.1006964), 2019-12-02
Supplement: pcbi.1006964.s006.pdf [file pcbi.1006964.s006.pdf]

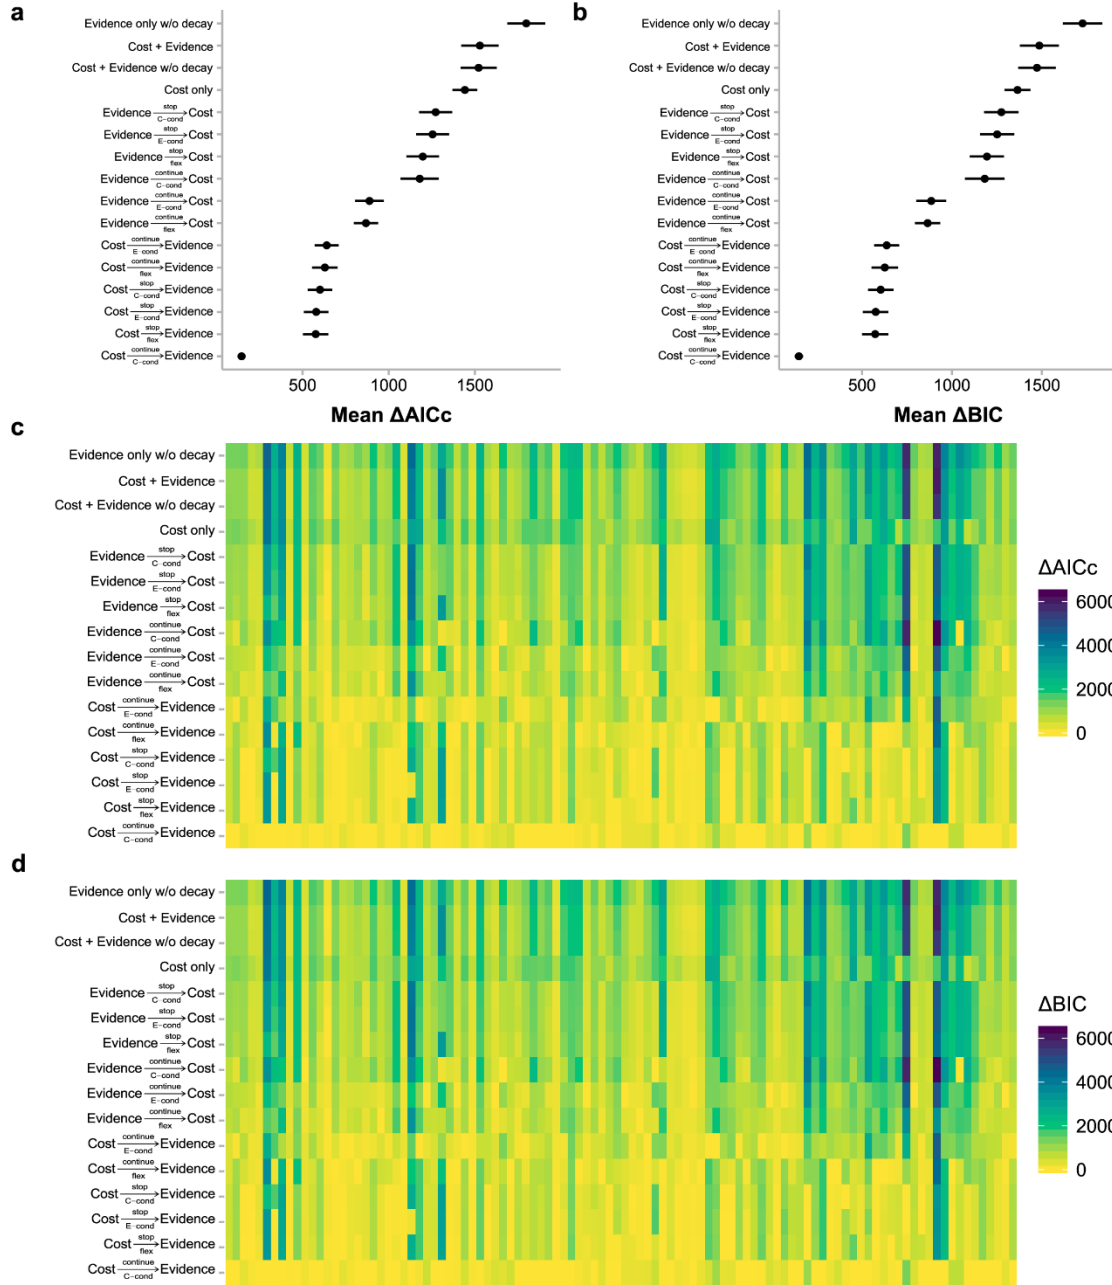

**S5 Fig. Model comparisons based on AICc and BIC and individual participants' model evidence.**

(a-b) Mean  $\Delta\text{AICc}$  and  $\Delta\text{BIC}$  for every model.  $\Delta\text{AICc}$  or  $\Delta\text{BIC}$  for a specific model was calculated for each participant with respect to the participant's best-fitting model (i.e. lowest AICc or BIC) and then averaged across participants. Error bars denote standard errors. Model comparisons based on AICc and BIC led to almost the same results. (c-d) Individual participants'  $\Delta\text{AICc}$  and  $\Delta\text{BIC}$  for every model. In the heatmaps, each column is for one participant, arranged in ascending order of AQ from left to right. Each row is for one model, arranged in the same order as in a-b.
