# Supplementary material for: Autistic traits influence the strategic diversity of information sampling: Insights from two-stage decision models
Source: PubMed Central journal article supplement (PMC6907874; doi:10.1371/journal.pcbi.1006964), 2019-12-02
Supplement: pcbi.1006964.s008.pdf [file pcbi.1006964.s008.pdf]

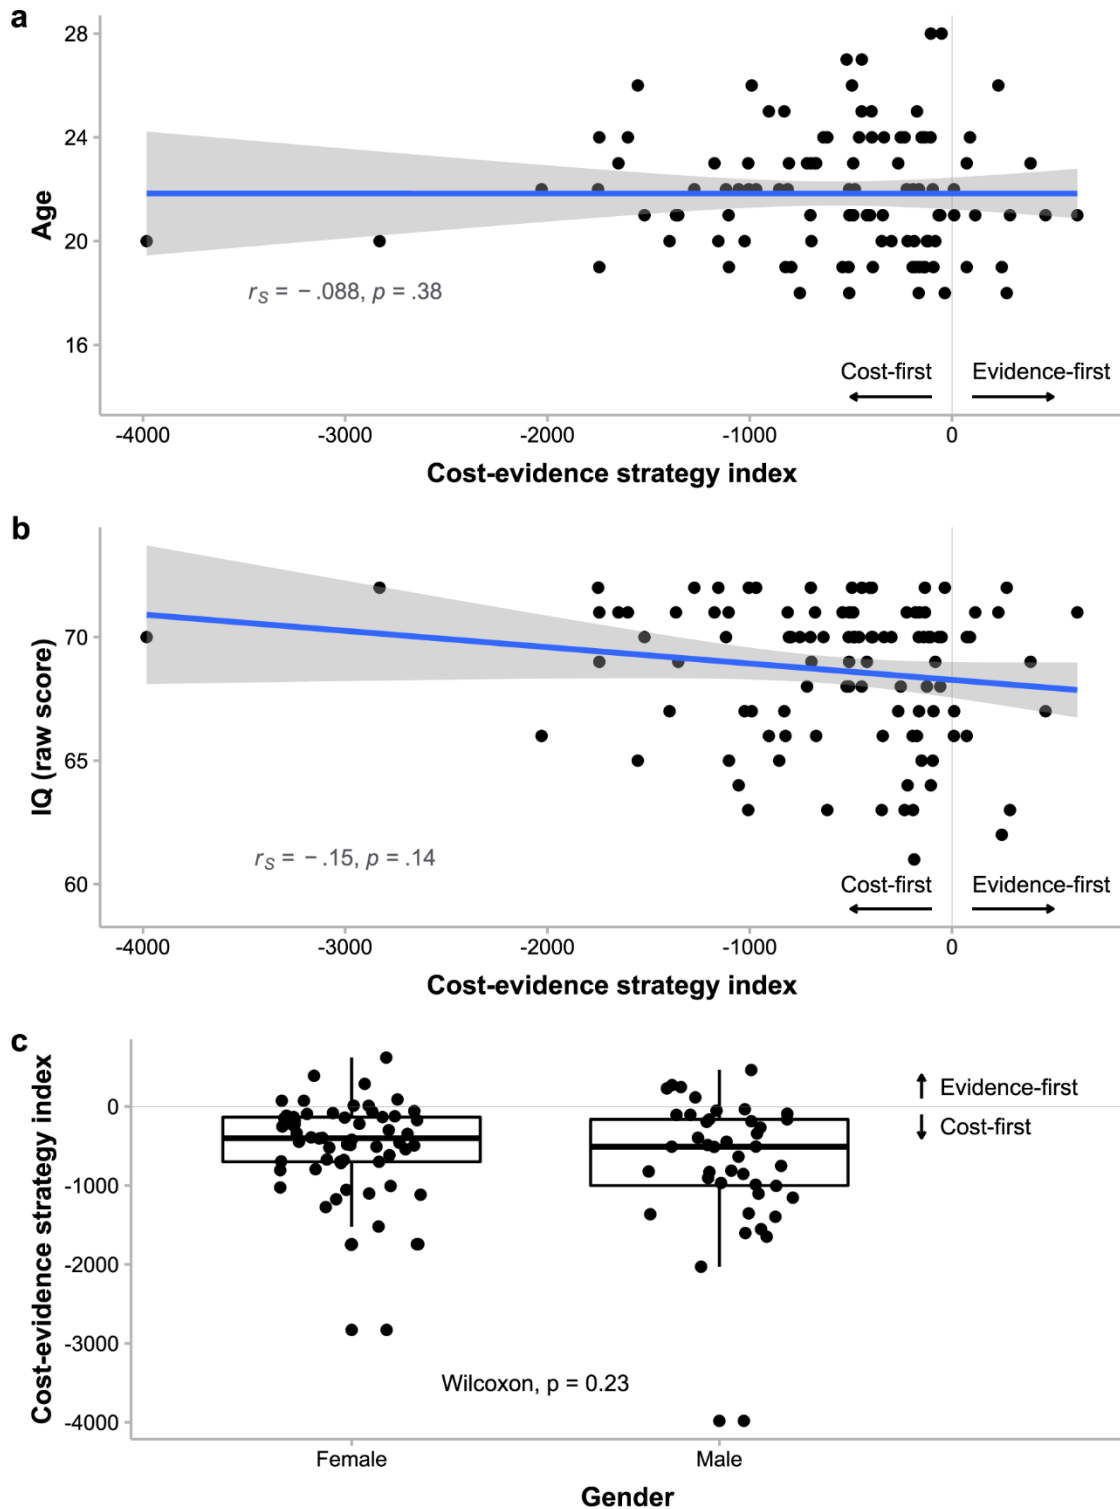

**S7 Fig. The use of cost-first vs. evidence-first decision did not relate to age, IQ, or gender.** There were little correlations between participants' cost-evidence strategy index

( $AICc_{\text{cost} \rightarrow \text{evidence}} - AICc_{\text{evidence} \rightarrow \text{cost}}$ ) and their age (a) or IQ score (b); cost-evidence strategy index did not differ between genders either (c).
