# Supplementary material for: Autistic traits influence the strategic diversity of information sampling: Insights from two-stage decision models
Source: PubMed Central journal article supplement (PMC6907874; doi:10.1371/journal.pcbi.1006964), 2019-12-02
Supplement: pcbi.1006964.s010.pdf [file pcbi.1006964.s010.pdf]

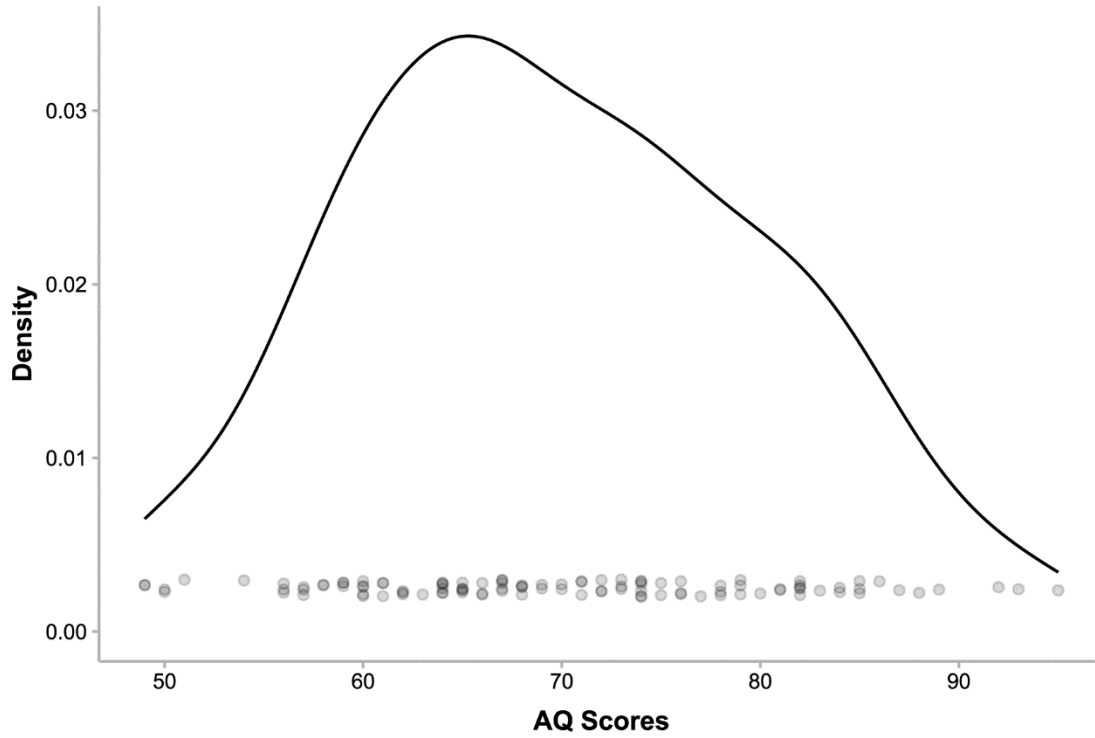

**S9 Fig. Distribution of AQ scores among the 104 participants.** Each circle denotes one participant.
