# Supplementary material for: Autistic traits influence the strategic diversity of information sampling: Insights from two-stage decision models
Source: PLoS Comput Biol. 2019 Dec 2;15(12):e1006964. doi: 10.1371/journal.pcbi.1006964 (PMC6907874; doi:10.1371/journal.pcbi.1006964)
Supplement: S2 Fig — (a) Similar to what we have found for the linear effect of AQ on efficiency, we have found a significant three-way interaction of AQ groups, cost and evidence conditions (F4,200.83 = 11.03, p < .001). The simple main effect showed the group with high AQ had higher efficiency in the zero-cost, low-evidence condition, compared to the other two groups with low and middle AQ scores (F2,132.62 = 4.27, p = .016; post hoc comparison: Low–Mid: t132.62 = 0.53, p = .86, Low–High: t132.62 = -2.23, p = .07, Mid–High: t132.62 = -2.77, p = .018, ps were corrected by single-step adjustment, see Methods). Meanwhile, the group with high AQ had significantly lower efficiency in the high-cost, low-evidence condition (simple main effect: F2,117.67 = 8.18, p < .001; post hoc comparison: Low–Mid: t118.45 = -1.60, p = .25, Low–High: t117.29 = 2.42, p = .044, Mid–High: t117.25 = 4.02, p < .001). All these results were consistent with those reported in the main text based on regressions (see Fig 2B). (b) Participants with different levels of autistic traits significantly differed in cost-evidence strategy index (i.e., AICccost→evidence−AICcevidence→cost; F2,101 = 5.96, p = .004), with the value of the high-AQ group smaller than those of the low-AQ group (t101 = -2.81, p = .017) and the middle-AQ group (t101 = -3.175, p = .006). This is consistent with the negative correlation between AQ and cost-evidence strategy index (see Fig 6A). In both (a) and (b), colored lines represent group means and semi-transparent gray symbols represent individual participants. Different shapes of symbols are for different AQ groups: circles for low-AQ, triangles for middle-AQ, and squares for high-AQ. Error bars denote model-based standard errors. Dark orange asterisks and lines indicate significant simple main effects (p < .05). (PDF) [file pcbi.1006964.s003.pdf]

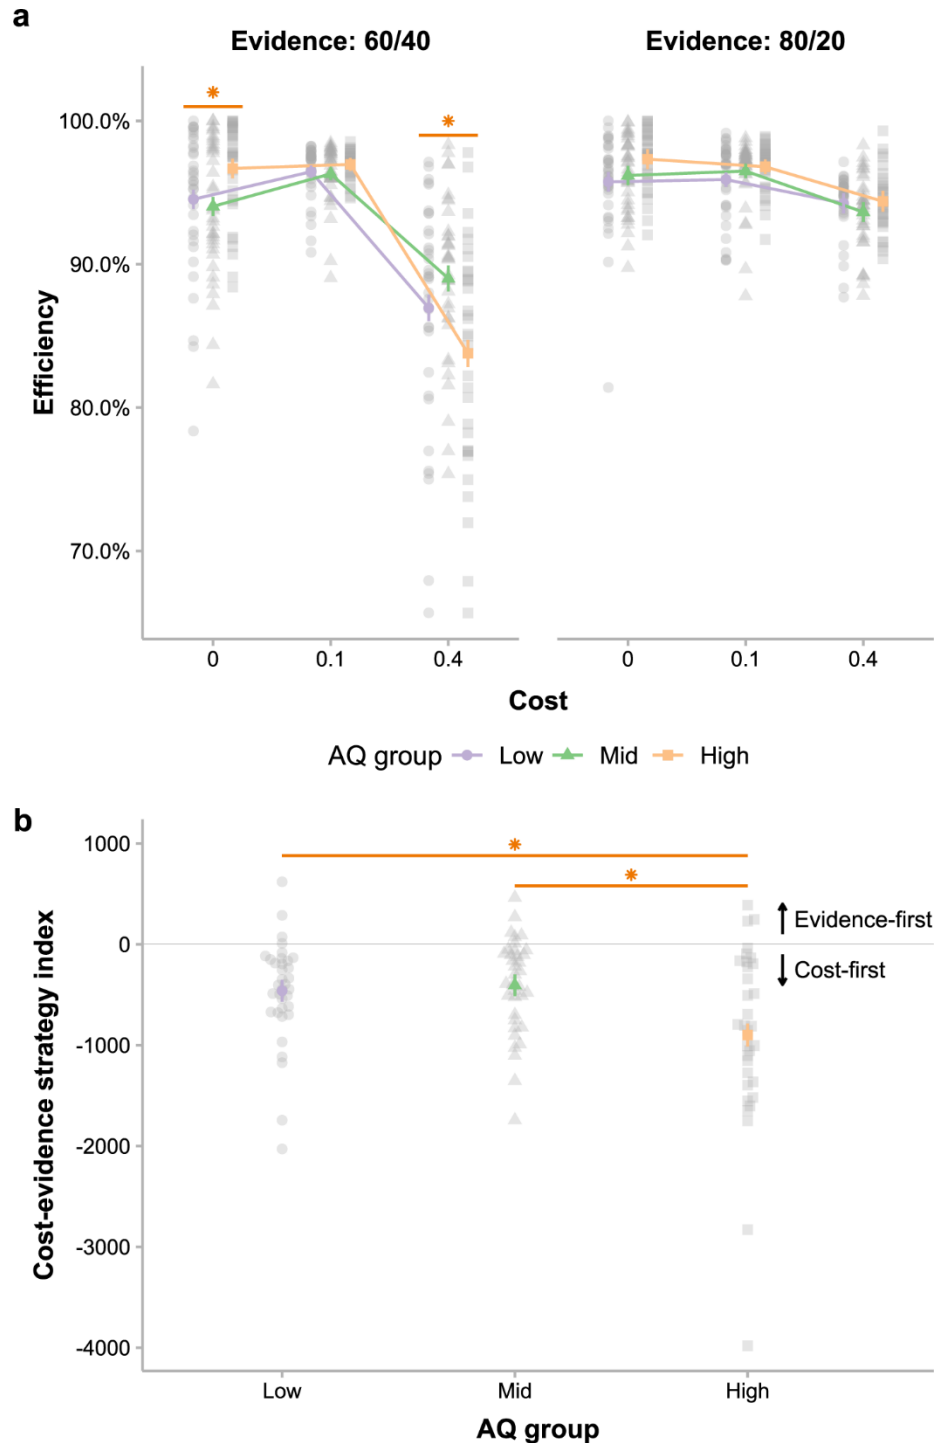

**S2 Fig. Replication of two analyses in the main text based on the tripartite division of AQ.**

(a) Similar to what we have found for the linear effect of AQ on efficiency, we have found a significant three-way interaction of AQ groups, cost and evidence conditions ( $F_{4,200.83} = 11.03$ ,  $p < .001$ ). The simple main effect showed the group with high AQ had higher efficiency in the zero-cost, low-evidence condition, compared to the other two groups with low and middle AQ scores ( $F_{2,132.62} = 4.27$ ,  $p = .016$ ; *post hoc* comparison: Low – Mid:  $t_{132.62} = 0.53$ ,  $p = .86$ , Low –

High:  $t_{132.62} = -2.23$ ,  $p = .07$ , Mid – High:  $t_{132.62} = -2.77$ ,  $p = .018$ ,  $p$ s were corrected by single-step adjustment, see Methods). Meanwhile, the group with high AQ had significantly lower efficiency in the high-cost, low-evidence condition (simple main effect:  $F_{2,117.67} = 8.18$ ,  $p < .001$ ; *post hoc* comparison: Low – Mid:  $t_{118.45} = -1.60$ ,  $p = .25$ , Low – High:  $t_{117.29} = 2.42$ ,  $p = .044$ , Mid – High:  $t_{117.25} = 4.02$ ,  $p < .001$ ). All these results were consistent with those reported in the main text based on regressions (see Fig 2b). (b) Participants with different levels of autistic traits

significantly differed in cost-evidence strategy index (i.e.,  $AICc_{\text{cost} \rightarrow \text{evidence}} - AICc_{\text{evidence} \rightarrow \text{cost}}$ ;

$F_{2,101} = 5.96$ ,  $p = .004$ ), with the value of the high-AQ group smaller than those of the low-AQ group ( $t_{101} = -2.81$ ,  $p = .017$ ) and the middle-AQ group ( $t_{101} = -3.175$ ,  $p = .006$ ). This is consistent with the negative correlation between AQ and cost-evidence strategy index (see Fig 6a). In both (a) and (b), colored lines represent group means and semi-transparent gray symbols represent individual participants. Different shapes of symbols are for different AQ groups: circles for low-AQ, triangles for middle-AQ, and squares for high-AQ. Error bars denote model-based standard errors. Dark orange asterisks and lines indicate significant simple main effects ( $p < .05$ ).
